# Supplementary material for: Unveiling the role of structure–property correlation and its validation towards engineering the application potential of sol–gel derived mesoporous gamma-alumina
Source: Royal Society of Chemistry journal article supplement (doi:10.1039/d1me00102g), 2021-10-13
Supplement: d1me00102g1.pdf [file d1me00102g1.pdf]

## Supporting Information

Ref: ME-ART-07-2021-000102

### “Unveiling the Role of Structure-Property Correlation and its Validation Towards Engineering the Applicative Potentiality of Sol-Gel Derived Mesoporous Gamma-alumina”

Savan Kumar Sharma,<sup>a</sup> Paromita Das<sup>a†</sup> and Barun K. Sanfui,<sup>\*a</sup>

<sup>a</sup>Department of Ceramic Technology, Government College of Engineering and Ceramic Technology (Autonomous Post Graduate) NAAC Accredited Grade A,

73, A. C. Banerjee Lane, Kolkata-700010, West Bengal, India,

\*E-Mail: [mailme.drbks@gmail.com](mailto:mailme.drbks@gmail.com)

† Currently working at Refractory and Traditional Ceramics Division, CSIR-CG&CRI, Jadavpur, Kolkata-700032, West Bengal, India

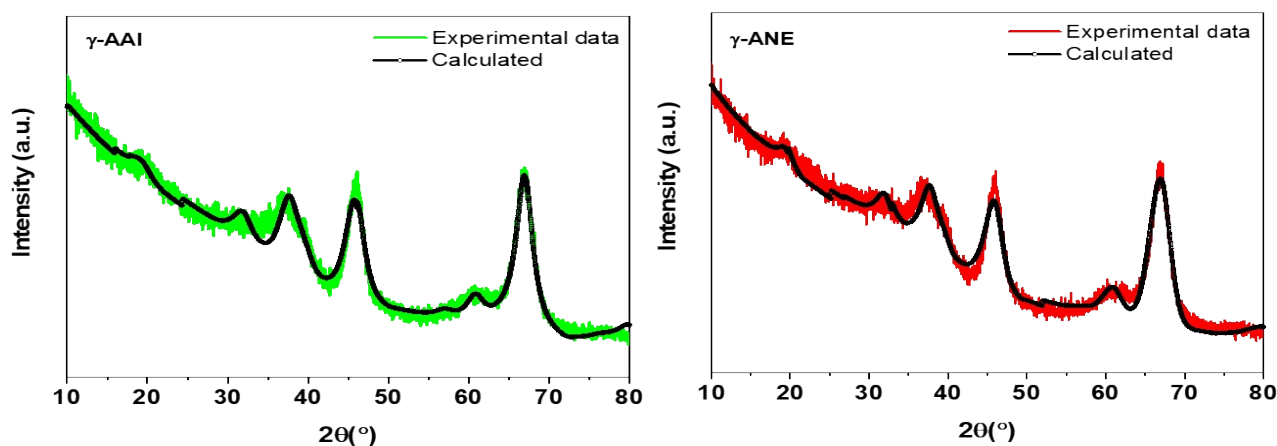

Fig.S1 Powder X-ray diffraction pattern (experimental data) and Rietveld refinement (calculated) of the of  $\gamma$ -AAI and  $\gamma$ -ANE powders.

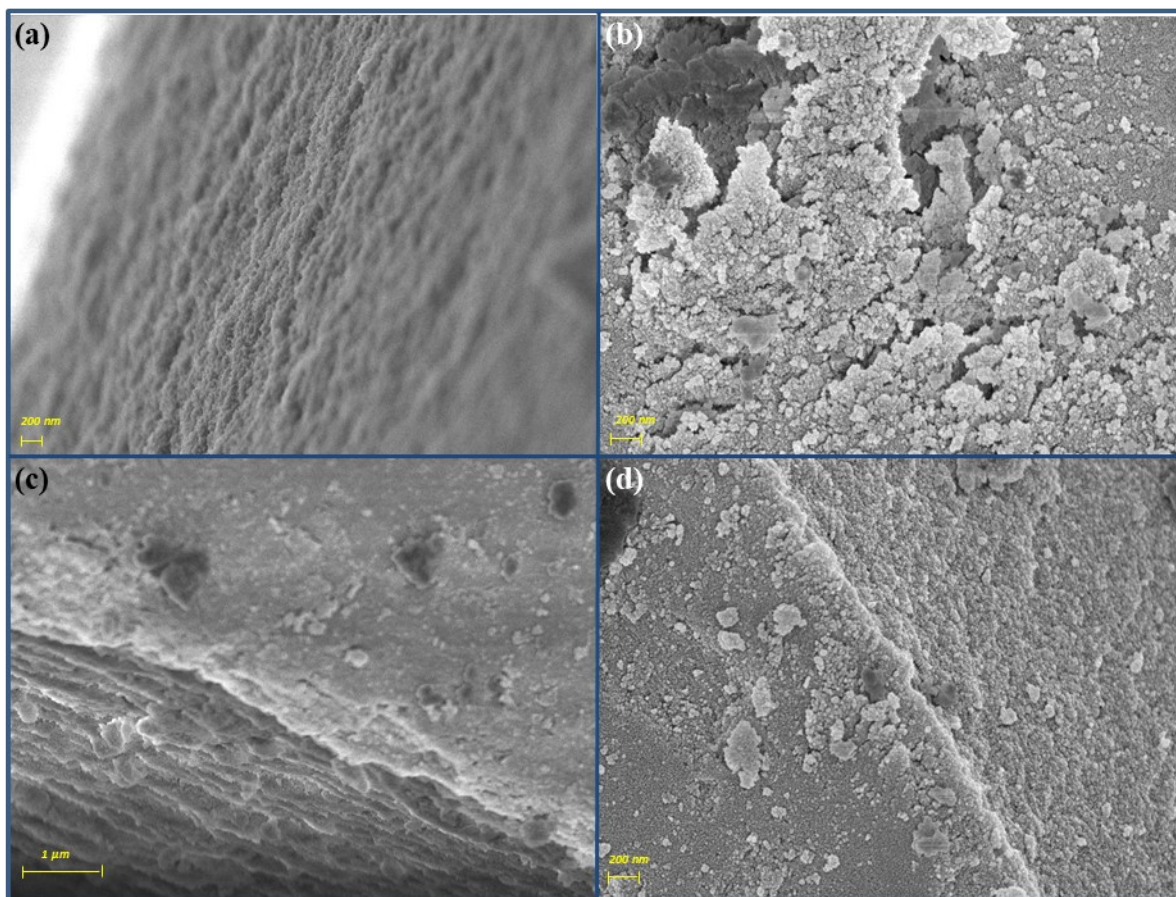

**Fig. S2** FESEM micrographs of  $\gamma$ -AAI powder (a, b) and  $\gamma$ -ANE powder (c, d) respectively.
